# Supplementary material for: Spatial and temporal variability in the response of phytoplankton and bacterioplankton to B-vitamin amendments in an upwelling system
Source: Copernicus journal article supplement (doi:10.5194/bg-2019-306), 2019-08-22
Supplement: Supplementary file [file bg-2019-306-AC2-supplement.zip]

## Supplement information

- 1 **Table S1:** concentration of hydroxocobalamin (OHB12) and cyanocobalamin (CNB12)
- 2 in seawater samples corresponding to the initial time of the experiments. Abbreviations:
- 3 Not detected (nd) and lower concentration of the quantification limit (<LOQ).

| Sample ID      | Station | Depth   | Month    | OHB12<br>pM | CNB 2<br>pM |
|----------------|---------|---------|----------|-------------|-------------|
| 1602_st3_d1_p1 | coast   | surface | February | 0.21        | nd          |
| 1602_st3_d3_p1 | coast   | surface | February | 0.20        | nd          |
| 1602_st3_d5_p1 | coast   | surface | February | 0.26        | nd          |
| 1604_st3_d1_p1 | coast   | surface | April    | 0.47        | nd          |
| 1604_st3_d3_p1 | coast   | surface | April    | 0.66        | nd          |
| 1604_st3_d5_p1 | coast   | surface | April    | 0.23        | nd          |
| 1608_st3_d1_p1 | coast   | surface | August   | 0.30        | nd          |
| 1608_st3_d3_p1 | coast   | surface | August   | 0.38        | nd          |
| 1608_st3_d5_p1 | coast   | surface | August   | 0.19        | nd          |
| 1602_st3_d1_p2 | coast   | SCM     | February | 0.36        | nd          |
| 1602_st3_d3_p2 | coast   | SCM     | February | 0.10        | nd          |
| 1602_st3_d5_p2 | coast   | SCM     | February | 0.41        | nd          |
| 1604_st3_d1_p2 | coast   | SCM     | April    | 0.32        | nd          |
| 1604_st3_d3_p2 | coast   | SCM     | April    | 0.27        | nd          |
| 1604_st3_d5_p3 | coast   | SCM     | April    | 0.15        | nd          |
| 1608_st3_d1_p2 | coast   | SCM     | August   | 0.46        | nd          |
| 1608_st3_d3_p2 | coast   | SCM     | August   | 0.21        | nd          |
| 1608_st3_d5_p2 | coast   | SCM     | August   | 0.39        | nd          |
| 1602_st6_d1_p1 | ocean   | surface | February | 0.31        | nd          |
| 1602_st6_d3_p1 | ocean   | surface | February | 0.09        | nd          |
| 1602_st6_d5_p1 | ocean   | surface | February | 0.06        | nd          |
| 1604_st6_d1_p1 | ocean   | surface | April    | 0.13        | nd          |
| 1604_st6_d3_p1 | ocean   | surface | April    | 0.09        | nd          |
| 1604_st6_d6_p1 | ocean   | surface | April    | 0.04        | nd          |
| 1608_st6_d1_p1 | ocean   | surface | August   | 0.20        | nd          |
| 1608_st6_d3_p1 | ocean   | surface | August   | 0.09        | nd          |
| 1608_st6_d6_p1 | ocean   | surface | August   | 0.14        | nd          |
| 1602_st6_d1_p3 | ocean   | SCM     | February | 0.21        | 0.55        |
| 1602_st6_d3_p2 | ocean   | SCM     | February | 0.08        | nd          |
| 1604_st6_d1_p2 | ocean   | SCM     | April    | nd          | nd          |
| 1604_st6_d3_p2 | ocean   | SCM     | April    | 0.07        | nd          |
| 1604_st6_d6_p2 | ocean   | SCM     | April    | 0.05        | nd          |
| 1608_st6_d1_p2 | ocean   | SCM     | August   | 0.19        | nd          |
| 1608_st6_d3_p2 | ocean   | SCM     | August   | 0.09        | nd          |
| 1608_st6_d6_p2 | ocean   | SCM     | August   | 0.16        | nd          |

8 **Table S2:** Summary of initial conditions for each experiment (expt). Sampling months  
9 were February (Feb), April (Apr) and August (Aug).

| Station | Depth   | Month | Expt | Temp<br>°C | Sal   | NO <sub>3</sub> <sup>-</sup><br>μM | NO <sub>2</sub> <sup>-</sup><br>μM | NH <sub>4</sub> <sup>+</sup><br>μM | HPO <sub>4</sub> <sup>2-</sup><br>μM | DIN:P | SiO <sub>4</sub> <sup>2-</sup><br>μM | Chl-a<br>μg l <sup>-1</sup> | BB<br>μgC l <sup>-1</sup> |
|---------|---------|-------|------|------------|-------|------------------------------------|------------------------------------|------------------------------------|--------------------------------------|-------|--------------------------------------|-----------------------------|---------------------------|
| Coast   | surface | Feb   | 3a   | 13.75      | 35.02 | 2.86                               | 0.19                               | 0.35                               | 0.17                                 | 19.65 | 3.62                                 | 1.39                        | 1.84                      |
|         |         |       | 3b   | 13.22      | 34.27 | 4.89                               | 0.36                               | 0.51                               | 0.33                                 | 17.25 | 6.77                                 | 0.73                        | 1.91                      |
|         |         |       | 3c   | 13.43      | 34.21 | 4.63                               | 0.19                               | 0.09                               | 0.18                                 | 27.68 | 8.57                                 | 4.86                        | 3.45                      |
|         |         | Apr   | 3a   | 12.96      | 34.58 | 2.21                               | 0.24                               | 0.32                               | 0.19                                 | 14.55 | 5.24                                 | 2.73                        | 7.88                      |
|         |         |       | 3b   | 13.31      | 34.25 | 12.46                              | 0.36                               | 0.54                               | 0.41                                 | 32.73 | 12.57                                | 1.40                        | 9.17                      |
|         |         |       | 3c   | 14.04      | 31.83 | 4.18                               | 0.16                               | 0.55                               | 0.19                                 | 25.90 | 10.52                                | 2.18                        | 4.30                      |
|         |         | Aug   | 3a   | 14.14      | 35.60 | 0.50                               | 0.10                               | 0.84                               | 0.12                                 | 11.77 | 1.11                                 | 5.73                        | 14.64                     |
|         |         |       | 3b   | 14.36      | 35.61 | 0.81                               | 0.08                               | 1.08                               | 0.20                                 | 9.95  | 0.28                                 | 5.52                        | 6.39                      |
|         |         |       | 3c   | 13.66      | 35.16 | 3.93                               | 0.17                               | 0.12                               | 0.33                                 | 12.78 | 3.86                                 | 5.64                        | 10.61                     |
|         | SCM     | Feb   | 3a   | 13.73      | 35.71 | 3.58                               | 0.14                               | 0.04                               | 0.31                                 | 12.13 | 5.25                                 | 0.21                        | 1.30                      |
|         |         |       | 3b   | 13.91      | 35.27 | 4.16                               | 0.15                               | 0.07                               | 0.37                                 | 11.91 | 4.63                                 | 0.99                        | 1.83                      |
|         |         |       | 3c   | 13.45      | 34.66 | 2.94                               | 0.09                               | 0.10                               | 0.17                                 | 18.37 | 6.13                                 | 4.98                        | 2.36                      |
|         |         | Apr   | 3a   | 12.80      | 35.34 | 3.22                               | 0.34                               | 0.46                               | 0.28                                 | 14.34 | 4.39                                 | 0.99                        | 5.90                      |
|         |         |       | 3b   | 13.22      | 35.28 | 0.24                               | 0.07                               | 0.12                               | 0.04                                 | 10.19 | 2.83                                 | 2.15                        | 9.47                      |
|         |         |       | 3c   | 13.92      | 34.95 | 0.21                               | 0.07                               | 0.10                               | 0.06                                 | 6.52  | 3.41                                 | 2.18                        | 9.51                      |
|         |         | Aug   | 3a   | 13.58      | 35.62 | 0.91                               | 0.13                               | 0.23                               | 0.15                                 | 8.32  | 1.68                                 | 20.75                       | 12.71                     |
|         |         |       | 3b   | 13.82      | 35.61 | 1.40                               | 0.16                               | 0.14                               | 0.23                                 | 7.49  | 1.40                                 | 20.07                       | 1.73                      |
|         |         |       | 3c   | 13.38      | 35.63 | 5.29                               | 0.13                               | 0.14                               | 0.41                                 | 13.47 | 3.93                                 | 4.63                        | 9.21                      |
| Ocean   | surface | Feb   | 6a   | 13.98      | 30.20 | 1.32                               | 0.18                               | 0.11                               | 0.16                                 | 10.07 | 3.23                                 | 0.82                        | 2.38                      |
|         |         |       | 6b   | 14.16      | 35.86 | 0.90                               | 0.11                               | 0.04                               | 0.12                                 | 9.15  | 2.29                                 | 1.20                        | 2.98                      |
|         |         |       | 6c   | 14.10      | 35.40 | 1.03                               | 0.15                               | 0.13                               | 0.16                                 | 8.43  | 2.97                                 | 2.08                        | 2.92                      |
|         |         | Apr   | 6a   | 13.44      | 35.68 | 0.95                               | 0.11                               | 0.06                               | 0.12                                 | 9.63  | 2.31                                 | 1.51                        | 6.58                      |
|         |         |       | 6b   | 13.59      | 35.66 | 0.47                               | 0.11                               | 0.06                               | 0.08                                 | 8.33  | 2.71                                 | 1.29                        | 7.37                      |
|         |         |       | 6c   | 13.93      | 35.57 | 0.12                               | 0.03                               | 0.06                               | 0.04                                 | 4.90  | 2.08                                 | 0.75                        | 11.76                     |
|         |         | Aug   | 6a   | 15.97      | 35.61 | 0.05                               | 0.01                               | 0.06                               | 0.02                                 | 4.88  | 1.46                                 | 0.65                        | 39.38                     |
|         |         |       | 6b   | 16.04      | 35.59 | 0.26                               | 0.01                               | 0.09                               | 0.05                                 | 7.46  | 3.21                                 | 0.99                        | 11.46                     |
|         |         |       | 6c   | 15.34      | 35.53 | 0.45                               | 0.04                               | 0.05                               | 0.07                                 | 7.38  | 1.37                                 | 1.30                        | 5.63                      |
|         | SCM     | Feb   | 6a   | 14.08      | 35.75 | 1.73                               | 0.20                               | 0.04                               | 0.18                                 | 11.18 | 3.47                                 | 0.88                        | 2.28                      |
|         |         |       | 6b   | 14.10      | 35.76 | 1.60                               | 0.19                               | 0.02                               | 0.15                                 | 11.75 | 2.86                                 | 1.22                        | 3.18                      |
|         |         |       | 6c   | 14.13      | 35.82 | 1.13                               | 0.18                               | 0.12                               | 0.16                                 | 9.17  | 2.92                                 | 2.39                        | 3.49                      |
|         |         | Apr   | 6a   | 13.28      | 35.69 | 1.63                               | 0.31                               | 0.10                               | 0.18                                 | 11.51 | 3.16                                 | 1.61                        | 5.38                      |
|         |         |       | 6b   | 13.28      | 35.68 | 1.45                               | 0.33                               | 0.12                               | 0.16                                 | 11.88 | 2.42                                 | 1.50                        | 6.96                      |
|         |         |       | 6c   | 13.72      | 35.60 | 0.03                               | 0.06                               | 0.07                               | 0.05                                 | 3.01  | 1.89                                 | 1.45                        | 11.74                     |
|         |         | Aug   | 6a   | 14.90      | 35.60 | 0.00                               | 0.04                               | 0.10                               | 0.03                                 | 4.20  | 1.44                                 | 0.84                        | 26.55                     |
|         |         |       | 6b   | 15.95      | 35.60 | 0.27                               | 0.00                               | 0.07                               | 0.05                                 | 6.45  | 2.79                                 | 1.11                        | 6.04                      |
|         |         |       | 6c   | 15.41      | 35.62 | 0.35                               | 0.06                               | 0.06                               | 0.07                                 | 6.51  | 1.66                                 | 1.41                        | 5.45                      |

10

11

**Figure S1:** A multidimensional scaling (MDS) showing the distance according to similarity in the microbial plankton composition at the beginning of each experiment (each symbol). Filled and open symbols represent samples from coastal and oceanic station, respectively, numbers correspond to the sampling station, triangles and circles represent samples from surface and SCM, respectively, and colours correspond to the months: (green) February, (blue) April and (pink) August.

**Figure S2:** Response ratio (RR) to inorganic nutrient addition (averaged biomass at the end of the experiments by the averaged value in the control) of total phytoplankton community (smooth bars) and of bacterial biomass (striped bars) at (a) coastal and (b) oceanic station. Each bar corresponds to one of the 3 experiments (a, b or c) performed in each depth and station during February, April and August. Colours represent samples from (light grey) surface and (dark grey) SCM. Horizontal line represents a response equal to 1, that means no change relative to control. Asterisks indicate phytoplankton significant response relative to control (t-test; \*  $p < 0.05$ ) and circle indicate bacterial significant response relative to the control (t-test; <sup>0</sup>  $p < 0.05$ ). Note that different scales were used.

**Figure S3:** Response ratio (RR) of total phytoplankton community (smooth bars) and of bacterial biomass (striped bars) at (a) surface and (b) SCM in the coastal station and at (c) surface and (d) SCM in the oceanic waters. Treatments represented are: B12; B1; B12+B1 in pink tones and I+B12/I; I+B1/I; I+B12+B1/I in green tones. Pink bars represent primary responses to B vitamins and green bars represent secondary responses to B vitamins. Horizontal line represents a response equal to 1, that means no change relative to control in the primary responses, and no change relative to inorganic treatment in the secondary responses. Asterisks indicate phytoplankton significant response (t-test;

- 36 \*  $p < 0.05$ ) and circle indicate bacterial significant response (t-test; °  $p < 0.05$ ). Note that
- 37 different scales were used.

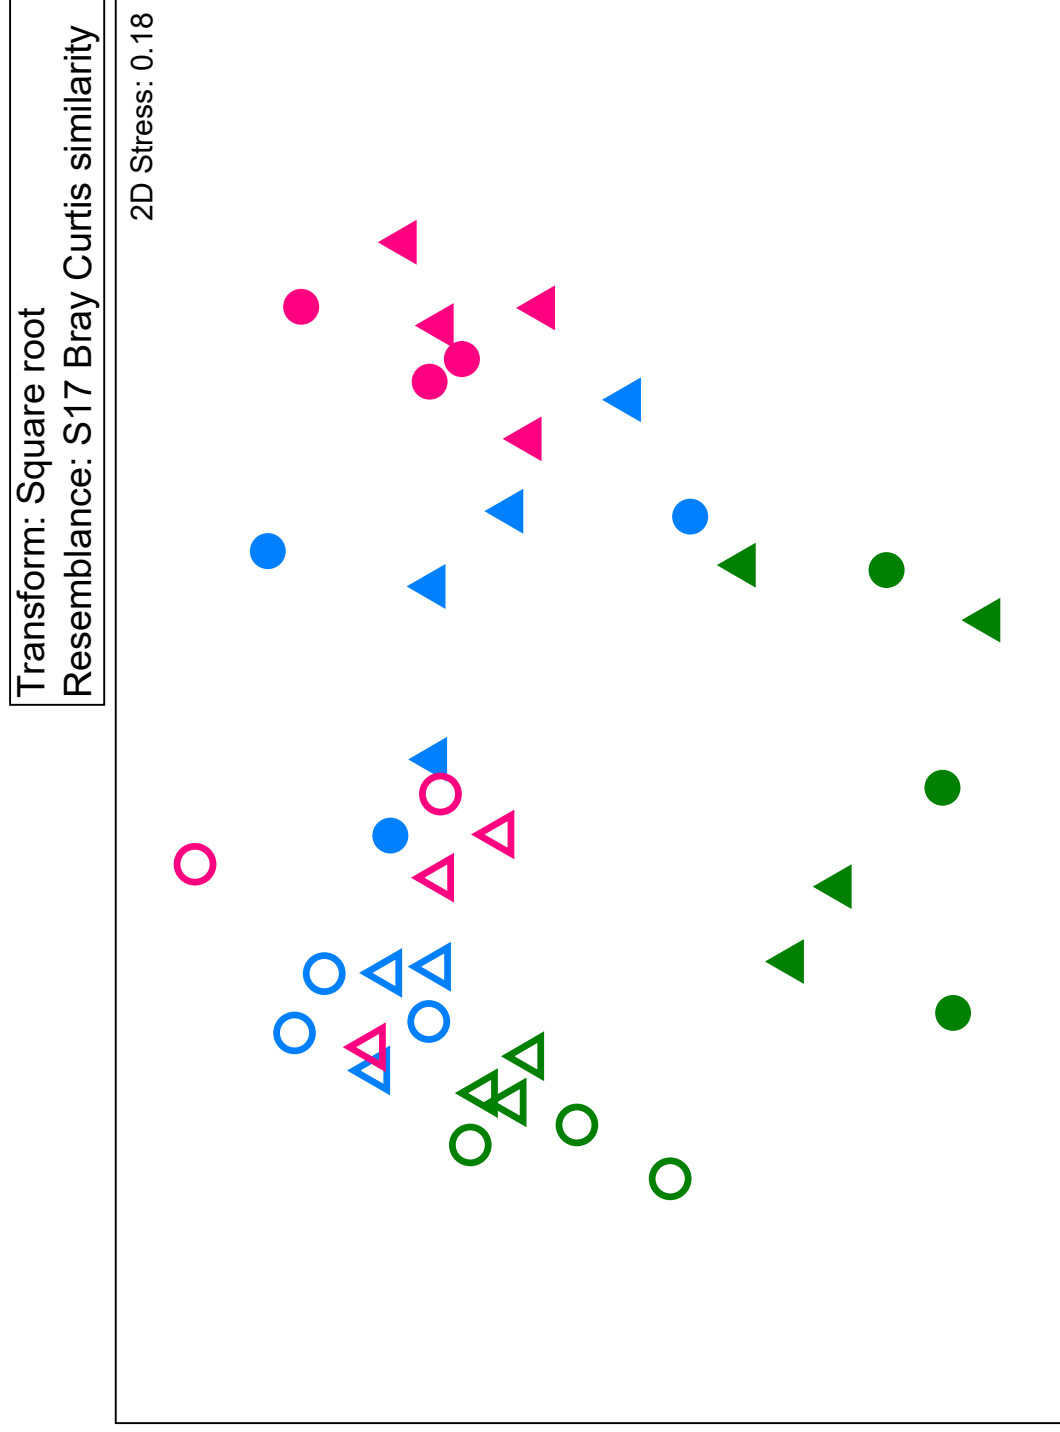

Figure S1

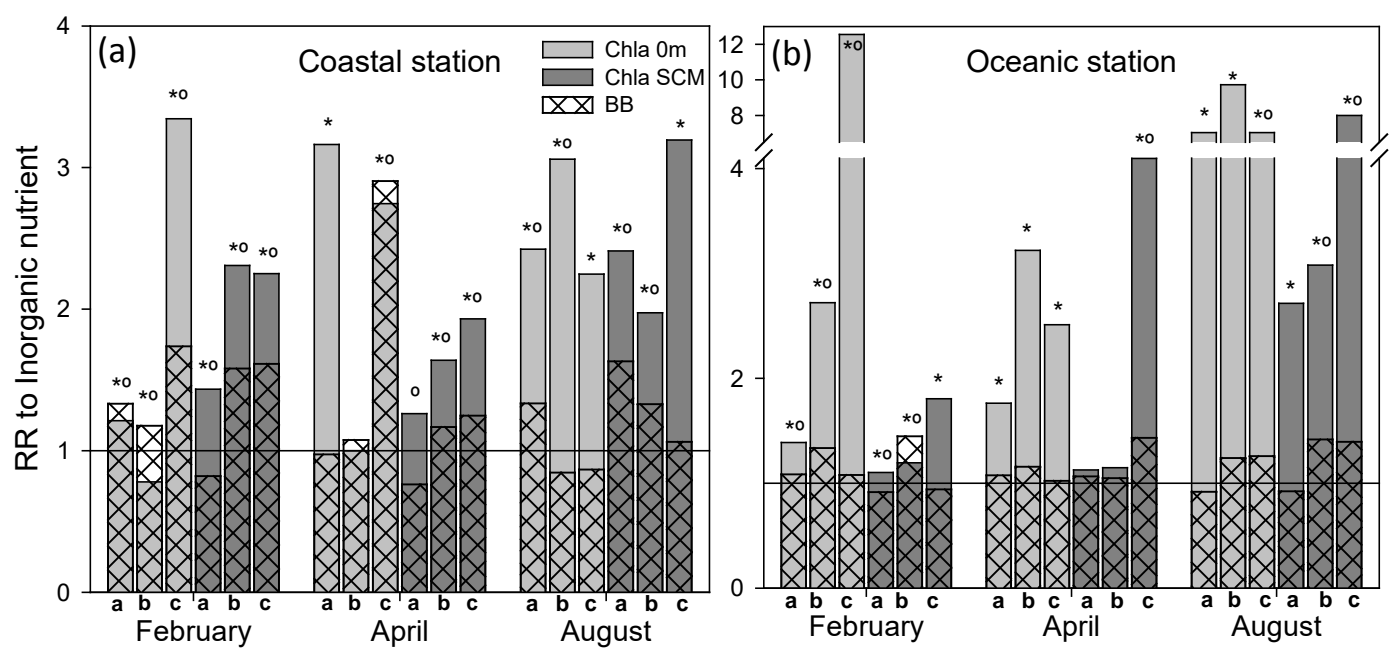

Figure S2

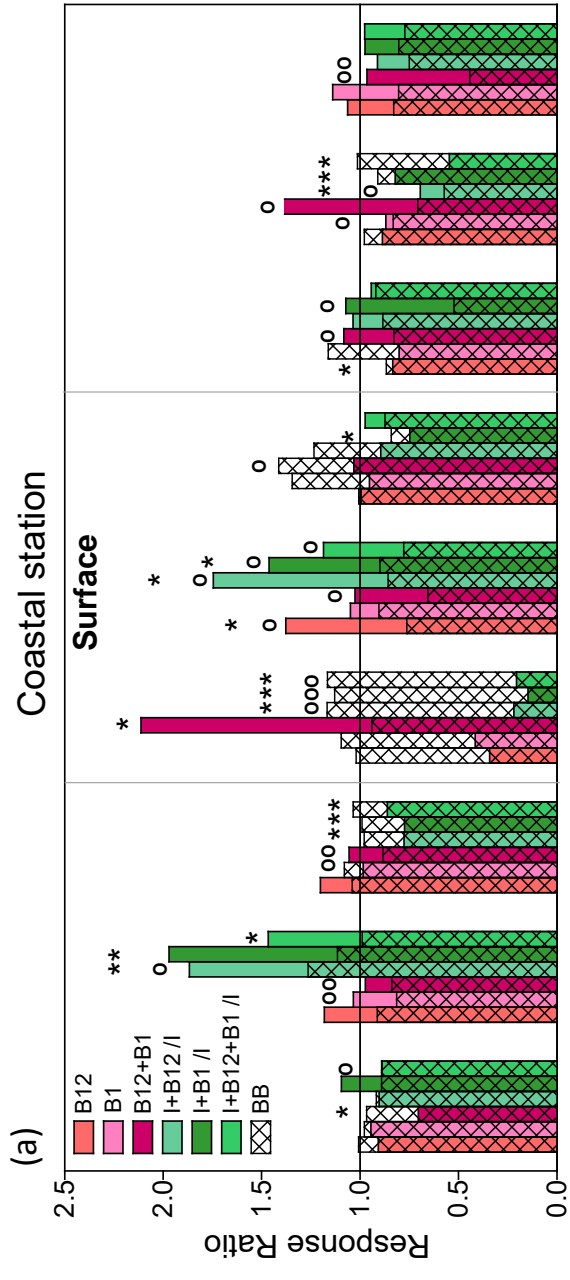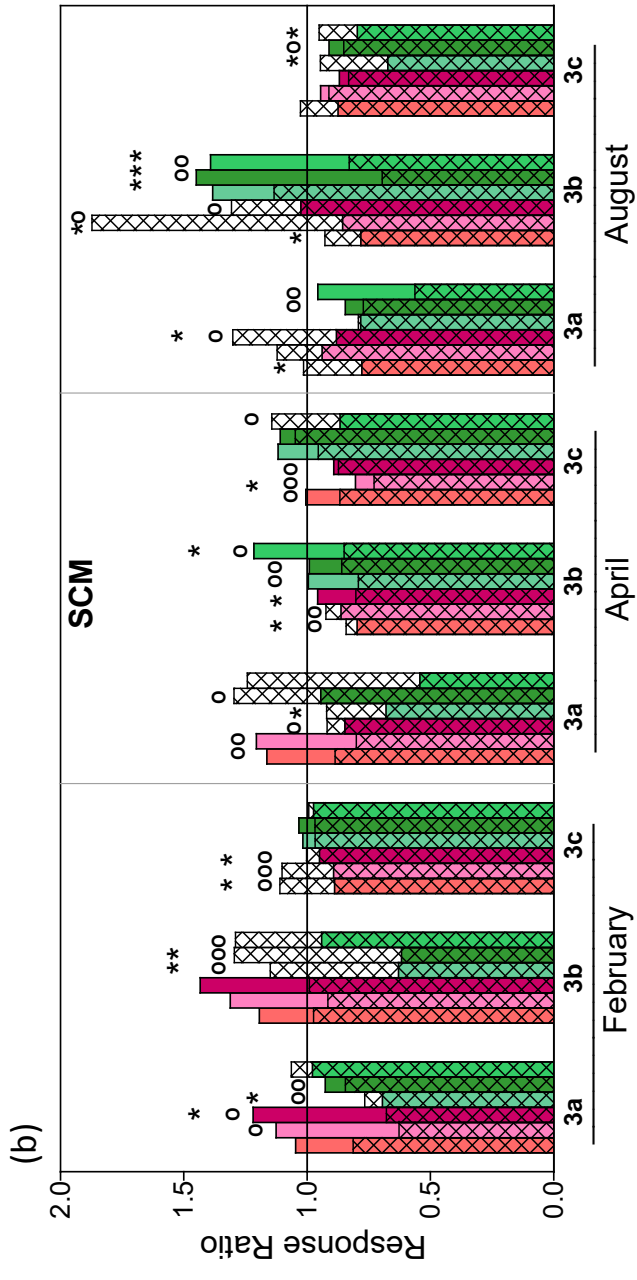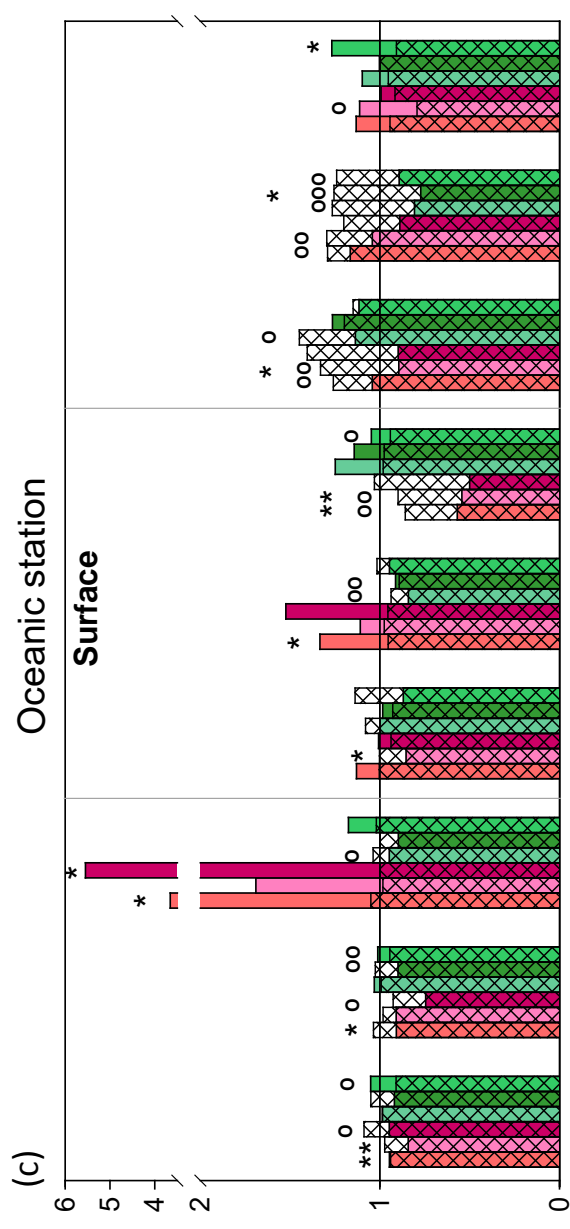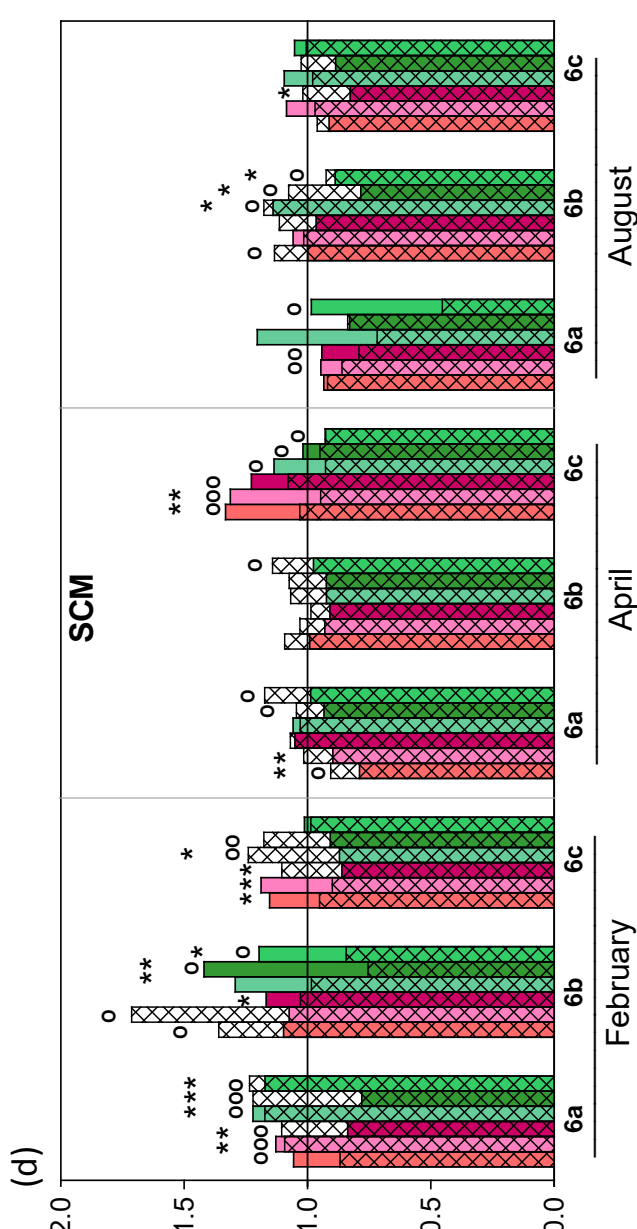

Figure S3
